# Supplementary material for: Re-Defining the Population-Specific Cut-Off Mark for Vitamin A Deficiency in Pre-School Children of Malawi
Source: PubMed Central journal article supplement (PMC8000145; doi:10.3390/nu13030849), 2021-03-05
Supplement: nutrients-13-00849-s001.pdf [file nutrients-13-00849-s001.pdf]

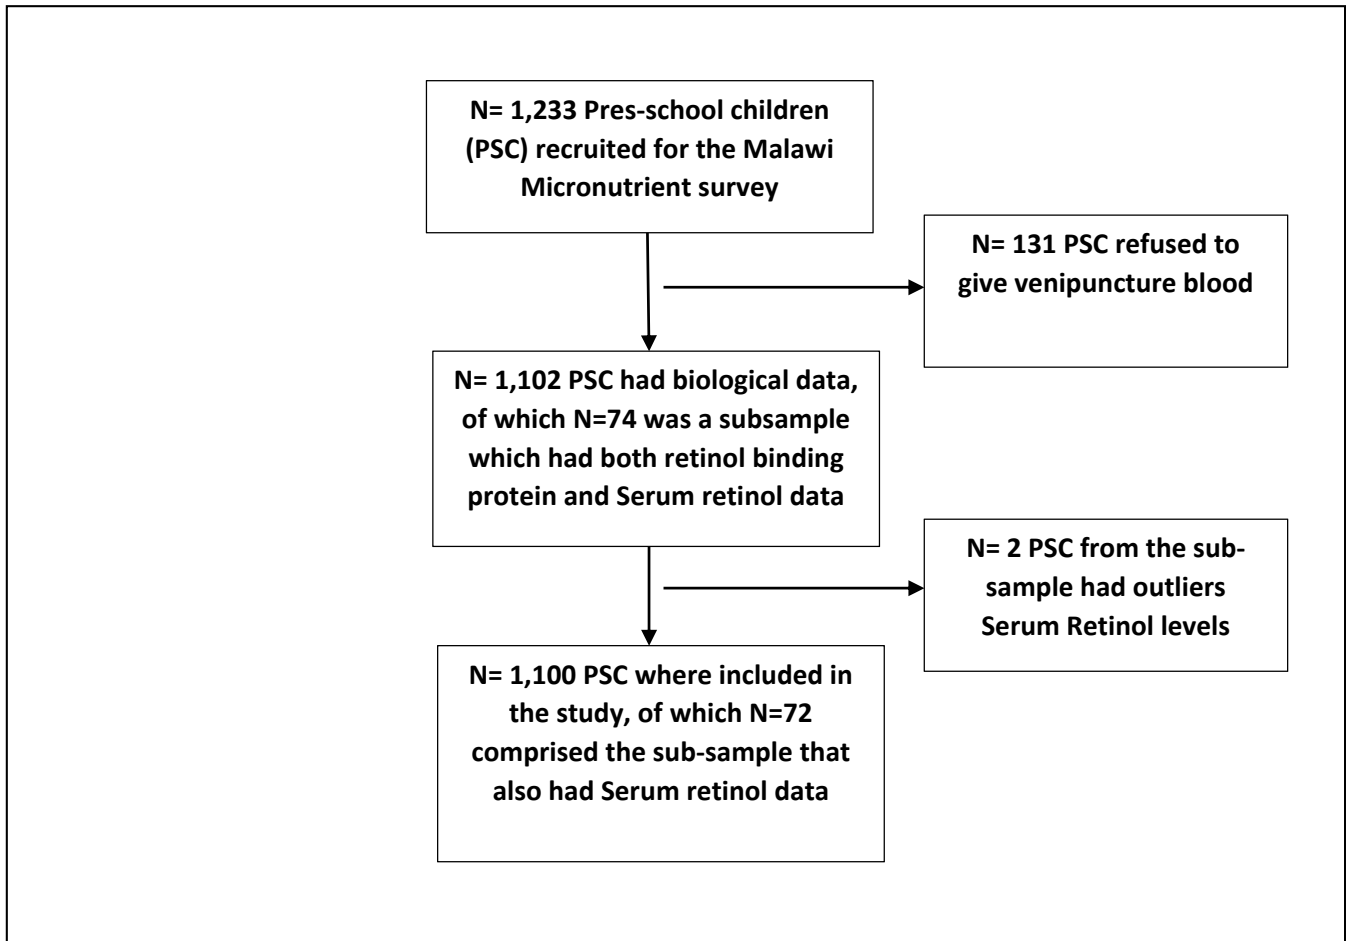

**Figure S1.** Flow chart of study participants, showing the full study sample as well as the study sub-sample.
